# Supplementary material
Source: publisher site journal article supplement (https://www.dovepress.com/article/316040)
Supplement: Supplementary file 1 [file get_supplementary_file.php]

**Additional table 1** Weight gain and reproductive outcomes

|  | |  | **Pregnancy *n* (%)** | | |  | **Pregnancy loss *n* (%)** a | | |  | **Live birth *n* (%)** | | |
| --- | --- | --- | --- | --- | --- | --- | --- | --- | --- | --- | --- | --- | --- |
|  | |  | Yes (29) No (15)  *P* value | | |  | Yes (8) No (21)  *P* value | | |  | Yes (22) No (22) *P* value | | |
| Total (*n*=44) | WG yes (*n*=7) |  | 5(71.43) | 2(28.57) | 1.000 |  | 1(20.00) | 4(80.00) | 1.000 |  | 4(57.14) | 3(42.86) | 1.000 |
| no (*n*=37) |  | 24(64.86) | 13(35.14) |  | 7(29.17) | 17(70.83) |  | 18(48.65) | 19(51.35) |
| BMI1 ≥ 25(*n*=30) | WG yes (*n*=2) |  | 1(50.00) | 1(50.00) | 1.000 |  | 1(100.0) | 0 | 0.400 |  | 0 | 2(100.0) | 0.492 |
|  | no (*n*=28) |  | 19(67.86) | 9(32.14) |  | 7(36.84) | 12(63.16) |  | 13(46.43) | 15(53.57) |
| BMI1＜25(*n*=14) | WG yes (*n*=5) |  | 4(80.00) | 1(20.00) | 0.580 |  | 0 | 4(100.0) | - |  | 4(80.00) | 1(20.00) | 0.580 |
|  | no (n=9) |  | 5(55.56) | 4(44.44) |  | 0 | 5(100.0) |  |  | 5(55.56) | 4(44.44) |

**Notes:** a: pregnancy loss including 6 early intrauterine pregnancy losses and 2 biochemical pregnancy losses

**Abbreviations:** WG,weight gain; WG: yes=patients with weight gain; no=patients with no body change and patients with weight loss;

BMI1: BMI at pre-progestin treatment;
